# Supplementary material for: Ring contraction of metallabenzooxirene to metal carbonyl complexes – a comparative study with the Wolff rearrangement of oxirene and benzooxirene
Source: Royal Society of Chemistry journal article supplement (doi:10.1039/c7dt02911j), 2017-01-01
Supplement: c7dt02911j1.pdf [file c7dt02911j1.pdf]

## Supporting Information for:

### Ring Contraction of Metallabenzooxirene to Metal Carbonyl Complexes – A Comparative Study with the Wolff Rearrangement of Oxirene and Benzooxirene

Chakkittakandiyil Anusha, Susmita De\* and Pattiyil Parameswaran\*

Department of Chemistry, National Institute of Technology Calicut, Kozhikode, Kerala, India - 673601.

E-mail : [param@nitc.ac.in](mailto:param@nitc.ac.in)

**Table S1:** Atomic orbital occupancies by natural population analysis (M06/def2-TZVPP//BP86/def2-SVP level of theory) on the selected atoms.

|              |    | Atomic Orbital Occupancy |                 |                 |                 |
|--------------|----|--------------------------|-----------------|-----------------|-----------------|
|              |    | 2s                       | 2p <sub>x</sub> | 2p <sub>y</sub> | 2p <sub>z</sub> |
| <b>1A</b>    | C1 | 1.04                     | 1.19            | 1.0             | 1.0             |
| <b>2A</b>    | C1 | 1.01                     | 1.16            | 0.78            | 0.99            |
|              | O  | 1.81                     | 1.47            | 1.24            | 1.98            |
| <b>3A</b>    | C1 | 1.01                     | 0.97            | 1.04            | 0.75            |
|              | C2 | 1.32                     | 0.63            | 0.77            | 1.34            |
|              | O  | 1.76                     | 1.48            | 1.57            | 1.63            |
| <b>3A-TS</b> | C1 | 1.43                     | 0.92            | 0.20            | 1.34            |
|              | C2 | 0.98                     | 0.93            | 1.09            | 0.80            |
|              | O  | 1.72                     | 1.57            | 1.77            | 1.45            |
| <b>4A</b>    | C1 | 0.85                     | 0.87            | 0.62            | 0.91            |
|              | C2 | 1.09                     | 1.10            | 1.23            | 1.37            |
|              | O  | 1.70                     | 1.57            | 1.45            | 1.69            |
| <b>1C</b>    | C1 | 0.97                     | 1.09            | 0.93            | 0.96            |
| <b>2C</b>    | C1 | 0.95                     | 0.82            | 0.82            | 1.09            |
|              | C2 | 0.95                     | 0.82            | 0.82            | 1.09            |
|              | O  | 1.87                     | 1.36            | 1.36            | 1.39            |
| <b>3C</b>    | C1 | 0.88                     | 1.10            | 0.87            | 0.85            |
|              | C2 | 1.01                     | 1.04            | 0.67            | 1.02            |
|              | O  | 1.77                     | 1.54            | 1.39            | 1.76            |
| <b>4C</b>    | C1 | 0.84                     | 0.86            | 0.61            | 0.86            |
|              | C2 | 0.94                     | 1.08            | 1.11            | 1.23            |
|              | O  | 1.71                     | 1.57            | 1.45            | 1.64            |

**Table S2:** Bond lengths and bond angles in the experimental products  $C_5H(CH_3)(SiMe_3)_2Os(PPh_3)_2Cl_2$ ,  $C_5HO(CH_3)Cl_2Os(PPh_3)_2Cl_2$  and optimized model geometries **10s** and **20s**.

|                   | $C_5H(CH_3)(SiMe_3)_2Os(PPh_3)_2Cl_2$ | $C_5HO(CH_3)Cl_2Os(PPh_3)_2Cl_2$ | <b>10s</b> | <b>20s</b> |
|-------------------|---------------------------------------|----------------------------------|------------|------------|
| Bond Lengths (Å)  |                                       |                                  |            |            |
| Os-P1             | 2.410                                 | 2.427                            | 2.382      | 2.377      |
| Os-P2             | 2.412                                 | 2.421                            | 2.382      | 2.376      |
| Os-Cl1            | 2.4798                                | 2.444                            | 2.469      | 2.459      |
| Os-Cl2            | 2.4811                                | 2.381                            | 2.498      | 2.432      |
| Os-C1             | 1.815                                 | 1.956                            | 1.793      | 2.003      |
| Os-C5             | 1.939                                 | 2.041                            | 1.386      | 2.067      |
| Os-O              | -                                     | 2.144                            | -          | 2.209      |
| O-C1              | 1.376                                 | 1.234                            | -          | 1.255      |
| C1-C2             | 1.420                                 | 1.370                            | 1.411      | 1.403      |
| C2-C3             | 1.416                                 | 1.380                            | 1.422      | 1.394      |
| C3-C4             | 1.378                                 | 1.411                            | 1.399      | 1.421      |
| C4-C5             | 1.515                                 | 1.347                            | 2.052      | 1.390      |
| Bond Angles (deg) |                                       |                                  |            |            |
| C1-Os-C5          | 78.1                                  | 77.8                             | 81.0       | 79.2       |
| C1-Os-O1          | -                                     | 34.6                             | -          | 34.2       |
| C5-Os-O1          | -                                     | 112.4                            | -          | 113.4      |
| O-C1-Os           | -                                     | 81.1                             | -          | 81.9       |
| C2-C1-Os          | 148.7                                 | 142.1                            | 149.3      | 142.3      |

**Table S3:** Wiberg bond indices (M06/def2-TZVPP level of theory) of **1M**, **2M**, **5M** and **6M** (M = Fe, Ru, Os) at the M06/def2-TZVPP//BP86 /def2-SVP level of theory.

| Wiberg bond indices |       |       |       |       |       |
|---------------------|-------|-------|-------|-------|-------|
|                     | C1-O  | M-C1  | M-C5  | M-O   | M-C2  |
| <b>1Fe</b>          |       | 1.565 | 0.853 |       |       |
| <b>1Ru</b>          |       | 1.750 | 0.912 |       |       |
| <b>1Os</b>          |       | 1.781 | 0.904 |       |       |
| <b>2Fe</b>          | 1.598 | 0.644 | 0.798 | 0.548 |       |
| <b>2Ru</b>          | 1.539 | 0.760 | 0.875 | 0.559 |       |
| <b>2Os</b>          | 1.481 | 0.904 | 0.872 | 0.547 |       |
| <b>3Fe</b>          | 1.774 | 0.668 | 0.846 | 0.256 |       |
| <b>3Ru</b>          | 1.770 | 0.737 | 0.909 | 0.252 |       |
| <b>3Os</b>          | 1.744 | 0.750 | 0.907 | 0.238 |       |
| <b>4Fe</b>          | 1.935 | 0.664 | 0.988 |       | 0.506 |
| <b>4Ru</b>          | 1.916 | 0.785 | 1.039 |       | 0.550 |
| <b>4Os</b>          | 1.875 | 0.831 | 1.029 |       | 0.556 |

**Table S4:** Optimized Cartesian coordinates and total energies including zero point energy correction E1 (in a.u.) of all calculated molecules at BP86/def2-SVP level of theory and E2 energy at M06/TZVPP level of theory including zero point energy correction from BP86/def2-SVP level of theory using G09 program package.

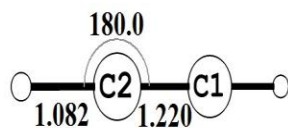

**1A** ( $D_{\infty h}$ )

Charge = 0 Multiplicity = 1  
 Nimg = 0  
 E1 = 0.026231  
 E2 = -77.2974307

|   |             |             |              |
|---|-------------|-------------|--------------|
| 6 | 0.000000000 | 0.000000000 | 0.610199000  |
| 1 | 0.000000000 | 0.000000000 | 1.692216000  |
| 6 | 0.000000000 | 0.000000000 | -0.610199000 |
| 1 | 0.000000000 | 0.000000000 | -1.692216000 |

**3A** ( $C_1$ )

Charge = 0 Multiplicity = 1  
 Nimg = 1  
 E1 = 0.029161  
 E2 = -152.4459635

|   |              |              |              |
|---|--------------|--------------|--------------|
| 6 | 1.038080000  | -0.147638000 | -0.157344000 |
| 1 | 1.561041000  | -0.702062000 | 0.642804000  |
| 6 | -0.096743000 | 0.587315000  | 0.043395000  |
| 1 | -0.417186000 | 1.650748000  | 0.084475000  |
| 8 | -0.848985000 | -0.448343000 | -0.005448000 |

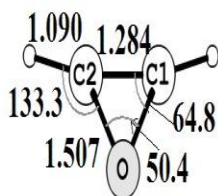

**2A** ( $C_{2v}$ )

Charge = 0 Multiplicity = 1  
 Nimg = 1  
 E1 = 0.027862  
 E2 = -152.4415929

|   |             |              |              |
|---|-------------|--------------|--------------|
| 6 | 0.000000000 | 0.641766000  | -0.465199000 |
| 1 | 0.000000000 | 1.678296000  | -0.803947000 |
| 6 | 0.000000000 | -0.641766000 | -0.465199000 |
| 1 | 0.000000000 | -1.678296000 | -0.803947000 |
| 8 | 0.000000000 | 0.000000000  | 0.898785000  |

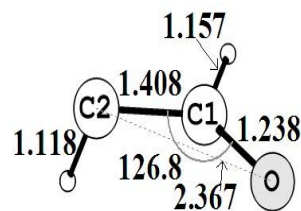

**3A-TS** ( $C_1$ )

Charge = 0 Multiplicity = 1  
 Nimg = 1  
 E1 = 0.026313  
 E2 = -152.440885

|   |              |              |              |
|---|--------------|--------------|--------------|
| 6 | 1.236687000  | -0.187214000 | -0.172881000 |
| 1 | 1.798774000  | -0.481924000 | 0.747881000  |
| 6 | -0.046436000 | 0.356709000  | 0.025811000  |
| 1 | 0.039965000  | 1.509514000  | 0.082359000  |
| 8 | -1.122530000 | -0.255570000 | 0.006523000  |

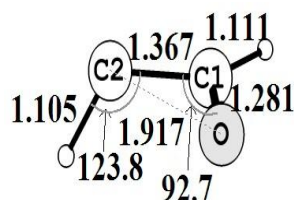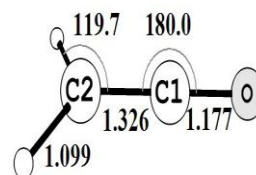

**4A** ( $C_{2v}$ )  
 Charge = 0 Multiplicity = 1  
 Nlmg = 0  
 E1 = 0.030470  
 E2 = -152.5727171

|   |             |              |              |
|---|-------------|--------------|--------------|
| 6 | 0.000000000 | 0.000000000  | 0.103754000  |
| 6 | 0.000000000 | 0.000000000  | -1.221818000 |
| 1 | 0.000000000 | 0.954334000  | -1.767095000 |
| 1 | 0.000000000 | -0.954334000 | -1.767095000 |
| 8 | 0.000000000 | 0.000000000  | 1.280322000  |

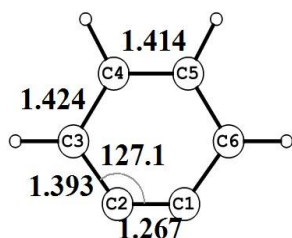

**1C** ( $C_{2v}$ )  
 Charge = 0 Multiplicity = 1  
 Nlmg = 0  
 E1 = 0.073062  
 E2 = -230.8071307

|   |             |              |              |
|---|-------------|--------------|--------------|
| 6 | 0.000000000 | 0.633552000  | -1.246642000 |
| 6 | 0.000000000 | -0.633552000 | -1.246642000 |
| 6 | 0.000000000 | -1.473906000 | -0.135104000 |
| 6 | 0.000000000 | -0.707165000 | 1.065241000  |
| 6 | 0.000000000 | 0.707165000  | 1.065241000  |
| 6 | 0.000000000 | 1.473906000  | -0.135104000 |
| 1 | 0.000000000 | -2.574644000 | -0.131563000 |
| 1 | 0.000000000 | -1.241260000 | 2.030596000  |
| 1 | 0.000000000 | 1.241260000  | 2.030596000  |
| 1 | 0.000000000 | 2.574644000  | -0.131563000 |

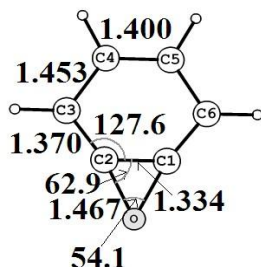

**2C** ( $C_{2v}$ )  
 Charge = 0 Multiplicity = 1  
 Nlmg = 0  
 E1 = 0.076605  
 E2 = -306.0076533

|   |             |              |              |
|---|-------------|--------------|--------------|
| 6 | 0.000000000 | 0.700071000  | -1.487418000 |
| 6 | 0.000000000 | 1.502903000  | -0.276284000 |
| 6 | 0.000000000 | 0.667206000  | 0.809378000  |
| 6 | 0.000000000 | -0.667206000 | 0.809378000  |
| 6 | 0.000000000 | -1.502903000 | -0.276284000 |
| 6 | 0.000000000 | -0.700071000 | -1.487418000 |
| 1 | 0.000000000 | 1.227351000  | -2.454810000 |
| 1 | 0.000000000 | 2.601611000  | -0.283260000 |
| 1 | 0.000000000 | -2.601611000 | -0.283260000 |
| 1 | 0.000000000 | -1.227351000 | -2.454810000 |
| 8 | 0.000000000 | 0.000000000  | 2.116003000  |

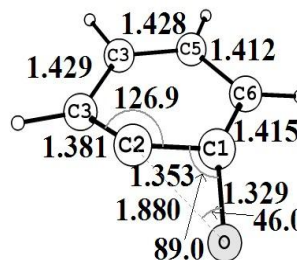

**3C** ( $C_1$ )  
 Charge = 0 Multiplicity = 1  
 Nlmg = 1  
 E1 = 0.075677  
 E2 = -305.9899804

|   |              |              |              |
|---|--------------|--------------|--------------|
| 6 | -1.650215000 | -0.333984000 | -0.045432000 |
| 6 | -0.729225000 | -1.424509000 | -0.103204000 |
| 6 | 0.505757000  | -0.948739000 | 0.292394000  |
| 6 | 0.978602000  | 0.309184000  | 0.136545000  |
| 6 | 0.123678000  | 1.429111000  | 0.008902000  |
| 6 | -1.230610000 | 1.030141000  | -0.004270000 |
| 1 | -2.728156000 | -0.559988000 | 0.020590000  |
| 1 | -1.038643000 | -2.471646000 | -0.237630000 |
| 1 | 0.443793000  | 2.468305000  | -0.155895000 |
| 1 | -2.016631000 | 1.802839000  | -0.035643000 |
| 8 | 2.168964000  | -0.200842000 | -0.162628000 |

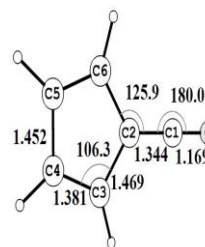

**4C** ( $C_{2v}$ )  
 Charge = 0 Multiplicity = 1  
 Nlmg = 0  
 E1 = 0.077409  
 E2 = -306.1124705

|   |              |              |              |
|---|--------------|--------------|--------------|
| 6 | -1.844991000 | -0.725848000 | -0.000249000 |
| 6 | -0.544162000 | -1.189307000 | 0.000116000  |

|   |              |              |              |
|---|--------------|--------------|--------------|
| 6 | 0.317893000  | -0.000044000 | 0.000344000  |
| 6 | 1.661939000  | -0.000150000 | -0.000285000 |
| 6 | -0.544180000 | 1.189357000  | 0.000232000  |
| 6 | -1.845011000 | 0.725902000  | -0.000191000 |
| 1 | -2.741281000 | -1.361903000 | 0.000283000  |
| 1 | -0.188198000 | -2.226417000 | 0.000549000  |
| 1 | -0.188154000 | 2.226501000  | 0.000540000  |
| 1 | -2.741531000 | 1.361629000  | -0.000497000 |
| 8 | 2.831280000  | 0.000091000  | -0.000085000 |

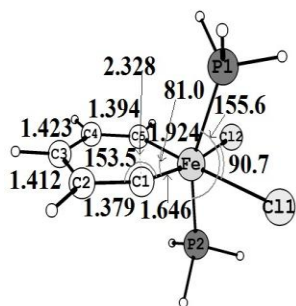

**1Fe (C<sub>1</sub>)**

Charge = 0 Multiplicity = 1

Nlmg = 0

E1 = 0.125790

E2 = -3063.1730494

|    |              |              |              |
|----|--------------|--------------|--------------|
| 6  | 2.731133000  | 0.006727000  | 1.101584000  |
| 6  | 3.364571000  | -0.003022000 | -0.172357000 |
| 6  | 2.601107000  | -0.011848000 | -1.360246000 |
| 6  | 1.247868000  | -0.010131000 | -1.092876000 |
| 6  | 1.343759000  | 0.008525000  | 1.232791000  |
| 1  | 3.371360000  | 0.013154000  | 2.001013000  |
| 1  | 4.466419000  | -0.003727000 | -0.243627000 |
| 1  | 3.041018000  | -0.019407000 | -2.369088000 |
| 1  | 0.926035000  | 0.016671000  | 2.258820000  |
| 17 | -1.876805000 | -0.017613000 | -1.598426000 |
| 17 | -1.562700000 | 0.021996000  | 1.774037000  |
| 1  | -0.116624000 | 2.984864000  | -1.145767000 |
| 1  | -1.900702000 | 2.477835000  | 0.034685000  |
| 1  | 0.003190000  | 2.971464000  | 1.029153000  |
| 1  | -0.137443000 | -2.999018000 | -1.104656000 |
| 1  | -1.904365000 | -2.473723000 | 0.094814000  |
| 1  | 0.011581000  | -2.959791000 | 1.068095000  |
| 26 | -0.055668000 | -0.000951000 | -0.087513000 |
| 15 | -0.516930000 | 2.169325000  | -0.037538000 |
| 15 | -0.521213000 | -2.169299000 | -0.001587000 |

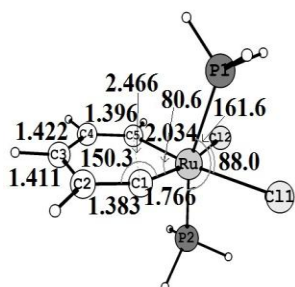

**1Ru (C<sub>1</sub>)**

Charge = 0 Multiplicity = 1

Nlmg = 0

E1 = 0.125285

E2 = -1894.4823325

|    |              |              |              |
|----|--------------|--------------|--------------|
| 6  | 2.798271000  | -0.187382000 | 1.088012000  |
| 6  | 3.423540000  | 0.083377000  | -0.160666000 |
| 6  | 2.692413000  | 0.319176000  | -1.344163000 |
| 6  | 1.322643000  | 0.266117000  | -1.158551000 |
| 6  | 1.413643000  | -0.246108000 | 1.252318000  |
| 1  | 3.456610000  | -0.357936000 | 1.958106000  |
| 1  | 4.526559000  | 0.110383000  | -0.213190000 |
| 1  | 3.173537000  | 0.523643000  | -2.313267000 |
| 1  | 1.038169000  | -0.468974000 | 2.270354000  |
| 17 | -2.114203000 | 0.363067000  | -1.430903000 |
| 17 | -1.524381000 | -0.503655000 | 1.832384000  |
| 1  | -0.599854000 | 3.183541000  | -0.772147000 |
| 1  | -1.729713000 | 2.521734000  | 1.003919000  |
| 1  | 0.386500000  | 3.064548000  | 1.174296000  |
| 1  | 0.271911000  | -2.966295000 | -1.513947000 |
| 1  | -1.752179000 | -2.621722000 | -0.745906000 |
| 1  | -0.113542000 | -3.175107000 | 0.627168000  |
| 15 | -0.492017000 | 2.296556000  | 0.339896000  |
| 15 | -0.402173000 | -2.283184000 | -0.448668000 |
| 44 | -0.074825000 | 0.021921000  | -0.107516000 |

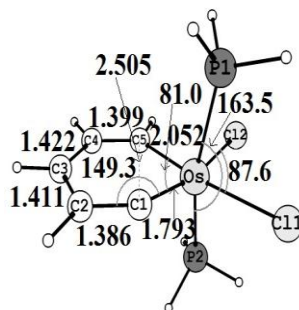

**1Os (Cs)**

Charge = 0 Multiplicity = 1

Nlmg = 0

E1 = 0.125188

E2 = -1890.2962721

|   |             |              |              |
|---|-------------|--------------|--------------|
| 6 | 2.803801000 | -0.016290000 | 1.131641000  |
| 6 | 3.438186000 | -0.017813000 | -0.141524000 |
| 6 | 2.727178000 | -0.012631000 | -1.359935000 |
| 6 | 1.351478000 | -0.005517000 | -1.195581000 |
| 6 | 1.416496000 | -0.009057000 | 1.308976000  |
| 1 | 3.460373000 | -0.021352000 | 2.019814000  |
| 1 | 4.542043000 | -0.023473000 | -0.183279000 |

|    |              |              |              |
|----|--------------|--------------|--------------|
| 1  | 3.230916000  | -0.014003000 | -2.339415000 |
| 1  | 1.056541000  | -0.009308000 | 2.356999000  |
| 76 | -0.070830000 | 0.001126000  | -0.103989000 |
| 17 | -2.117751000 | 0.012501000  | -1.484812000 |
| 17 | -1.551570000 | 0.001381000  | 1.907782000  |
| 1  | -1.672382000 | 2.789853000  | -0.396969000 |
| 1  | -0.257320000 | 2.980840000  | 1.289847000  |
| 1  | 0.448290000  | 3.237980000  | -0.766311000 |
| 1  | 0.347391000  | -3.236641000 | -0.830285000 |
| 1  | -1.739074000 | -2.752307000 | -0.336139000 |
| 1  | -0.235055000 | -2.997036000 | 1.264681000  |
| 15 | -0.375700000 | 2.360936000  | 0.009317000  |
| 15 | -0.413837000 | -2.354821000 | 0.002167000  |

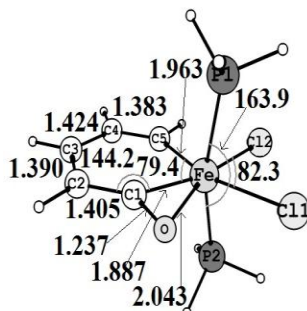

**2Fe (C<sub>1</sub>)**

Charge = 0 Multiplicity = 1

Nlmg = 0

E1 = 0.130034

E2 = -3138.4291167

|    |              |              |              |
|----|--------------|--------------|--------------|
| 6  | -2.601871000 | 0.342854000  | 1.334403000  |
| 6  | -3.408127000 | 0.046550000  | 0.198658000  |
| 6  | -2.826587000 | -0.229291000 | -1.033866000 |
| 6  | -1.422994000 | -0.211000000 | -1.091279000 |
| 6  | -1.219848000 | 0.364490000  | 1.292327000  |
| 1  | -3.111736000 | 0.569493000  | 2.287596000  |
| 1  | -4.507087000 | 0.044638000  | 0.291605000  |
| 1  | -3.401211000 | -0.444082000 | -1.947651000 |
| 1  | -0.714139000 | 0.617916000  | 2.241243000  |
| 17 | 2.199839000  | -0.464869000 | -1.132138000 |
| 17 | 1.565505000  | 0.475592000  | 1.753389000  |
| 1  | 0.269509000  | -3.124664000 | -0.582248000 |
| 1  | 1.633849000  | -2.502373000 | 1.030463000  |
| 1  | -0.500120000 | -2.795831000 | 1.426676000  |
| 1  | 0.021842000  | 2.755848000  | -1.694478000 |
| 1  | 1.917665000  | 2.503603000  | -0.629690000 |
| 1  | 0.113276000  | 3.164571000  | 0.441582000  |
| 26 | 0.148086000  | 0.001474000  | -0.068326000 |
| 15 | 0.370569000  | -2.163535000 | 0.473885000  |
| 15 | 0.541821000  | 2.168148000  | -0.489523000 |
| 8  | -0.549029000 | -0.370068000 | -1.952099000 |

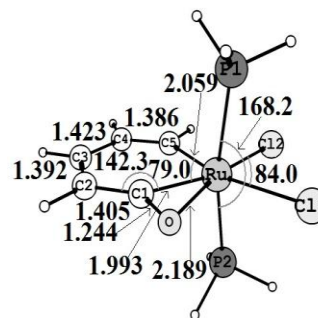

**2Ru (C<sub>1</sub>)**

Charge = 0 Multiplicity = 1

Nlmg = 0

E1 = 0.129620

E2 = -1969.7369376

|    |              |              |              |
|----|--------------|--------------|--------------|
| 6  | -2.669558000 | 0.210440000  | 1.381316000  |
| 6  | -3.454967000 | -0.002334000 | 0.213797000  |
| 6  | -2.890589000 | -0.205002000 | -1.042108000 |
| 6  | -1.489474000 | -0.201093000 | -1.140662000 |
| 6  | -1.283850000 | 0.239142000  | 1.389857000  |
| 1  | -3.208810000 | 0.364002000  | 2.333017000  |
| 1  | -4.554643000 | -0.005344000 | 0.304316000  |
| 1  | -3.490727000 | -0.365373000 | -1.950957000 |
| 1  | -0.822836000 | 0.421039000  | 2.377628000  |
| 17 | 2.310461000  | -0.290630000 | -1.178166000 |
| 17 | 1.532832000  | 0.419778000  | 1.891901000  |
| 1  | 0.359634000  | -3.174363000 | -0.796524000 |
| 1  | 1.685366000  | -2.682386000 | 0.884536000  |
| 1  | -0.449794000 | -3.027041000 | 1.221999000  |
| 1  | -0.227924000 | 2.909909000  | -1.557701000 |
| 1  | 1.738283000  | 2.742558000  | -0.612579000 |
| 1  | -0.036050000 | 3.229936000  | 0.590312000  |
| 15 | 0.423710000  | -2.309285000 | 0.340491000  |
| 15 | 0.395133000  | 2.309621000  | -0.413864000 |
| 44 | 0.167068000  | -0.001833000 | -0.050765000 |
| 8  | -0.653935000 | -0.347470000 | -2.050808000 |

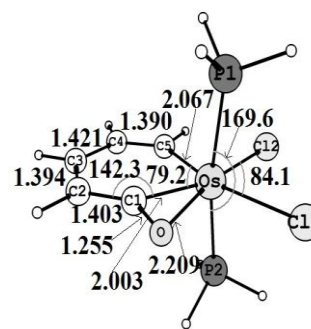

**2Os (C<sub>1</sub>)**

vshift) freq

Charge = 0 Multiplicity = 1

Nlmg = 0

E1 = 0.129694

E2 = -1965.5441479

|   |              |              |              |
|---|--------------|--------------|--------------|
| 6 | -2.702435000 | 0.035688000  | 1.404718000  |
| 6 | -3.481984000 | -0.011952000 | 0.217179000  |
| 6 | -2.918726000 | -0.052344000 | -1.057718000 |

|    |              |              |              |
|----|--------------|--------------|--------------|
| 6  | -1.519162000 | -0.046322000 | -1.151453000 |
| 6  | -1.312529000 | 0.047729000  | 1.432611000  |
| 1  | -3.248896000 | 0.065952000  | 2.364277000  |
| 1  | -4.581859000 | -0.016438000 | 0.306091000  |
| 1  | -3.523933000 | -0.087499000 | -1.976883000 |
| 1  | -0.871244000 | 0.088125000  | 2.445475000  |
| 76 | 0.142820000  | 0.001429000  | -0.034795000 |
| 17 | 2.304090000  | -0.052063000 | -1.206727000 |
| 17 | 1.518032000  | 0.083005000  | 1.969247000  |
| 1  | 1.713213000  | -2.826115000 | 0.155664000  |
| 1  | -0.272497000 | -3.129529000 | 1.048759000  |
| 1  | -0.045551000 | -3.112384000 | -1.120742000 |
| 1  | -0.245148000 | 3.068601000  | -1.224956000 |
| 1  | 1.686092000  | 2.839474000  | -0.217418000 |
| 1  | -0.148318000 | 3.167826000  | 0.952835000  |
| 15 | 0.371909000  | -2.363838000 | 0.026656000  |
| 15 | 0.344615000  | 2.366773000  | -0.123603000 |
| 8  | -0.678891000 | -0.071680000 | -2.083671000 |

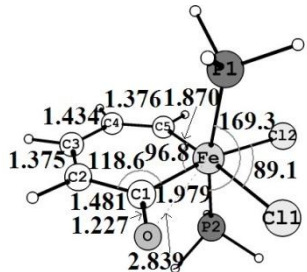

**3Fe (C<sub>1</sub>)**

Charge = 0 Multiplicity = 1

Nlmg = 0

E1 = 0.127914

E2 = -3138.3771273

|    |              |              |              |
|----|--------------|--------------|--------------|
| 6  | 3.121144000  | -0.489032000 | 0.221450000  |
| 6  | 2.654072000  | 0.609225000  | -0.460756000 |
| 6  | 1.238924000  | 0.979274000  | -0.694848000 |
| 6  | 0.950491000  | -1.451089000 | 0.823580000  |
| 6  | 2.324923000  | -1.509634000 | 0.838485000  |
| 1  | 4.219234000  | -0.590032000 | 0.287916000  |
| 1  | 3.364590000  | 1.352353000  | -0.857146000 |
| 1  | 0.381858000  | -2.298082000 | 1.258679000  |
| 1  | 2.845033000  | -2.368062000 | 1.299324000  |
| 8  | 1.000881000  | 2.012306000  | -1.312611000 |
| 26 | -0.179413000 | -0.144274000 | 0.106548000  |
| 15 | -0.278226000 | 1.158277000  | 1.910234000  |
| 1  | 0.178755000  | 2.510199000  | 1.806955000  |
| 1  | -1.596169000 | 1.378996000  | 2.409961000  |
| 1  | 0.377377000  | 0.799664000  | 3.134691000  |
| 15 | -0.485235000 | -1.359553000 | -1.722867000 |
| 1  | -1.729191000 | -1.158923000 | -2.389417000 |
| 1  | 0.402032000  | -1.232530000 | -2.844603000 |
| 1  | -0.481455000 | -2.784218000 | -1.610223000 |
| 17 | -1.490719000 | 1.568348000  | -0.887005000 |

|    |              |              |             |
|----|--------------|--------------|-------------|
| 17 | -2.132210000 | -1.201879000 | 0.772684000 |
|----|--------------|--------------|-------------|

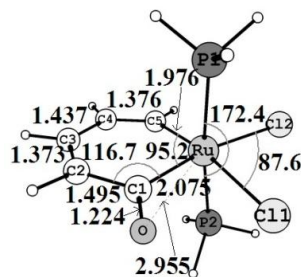

**3Ru (C<sub>1</sub>)**

Charge = 0 Multiplicity = 1

Nlmg = 0

E1 = 0.127252

E2 = -1969.6782805

|    |              |              |              |
|----|--------------|--------------|--------------|
| 6  | -3.183655000 | 0.108585000  | -0.525194000 |
| 6  | -2.685100000 | -0.693995000 | 0.471123000  |
| 6  | -1.262481000 | -0.956044000 | 0.848539000  |
| 6  | -1.073323000 | 0.994839000  | -1.411152000 |
| 6  | -2.445577000 | 0.905223000  | -1.466893000 |
| 1  | -4.285030000 | 0.128599000  | -0.612481000 |
| 1  | -3.387220000 | -1.207850000 | 1.147777000  |
| 1  | -0.561927000 | 1.558270000  | -2.222205000 |
| 1  | -3.011359000 | 1.416426000  | -2.265110000 |
| 8  | -1.048594000 | -1.735624000 | 1.767297000  |
| 44 | 0.185243000  | 0.153606000  | -0.141393000 |
| 15 | -0.063491000 | 1.834014000  | 1.468746000  |
| 1  | 0.075486000  | 1.435259000  | 2.834675000  |
| 1  | 0.886327000  | 2.901416000  | 1.426089000  |
| 1  | -1.272758000 | 2.595750000  | 1.565673000  |
| 15 | 0.693514000  | -1.615691000 | -1.603682000 |
| 1  | 2.083562000  | -1.795522000 | -1.871166000 |
| 1  | 0.341679000  | -2.942332000 | -1.204804000 |
| 1  | 0.188848000  | -1.647787000 | -2.945178000 |
| 17 | 1.505997000  | -1.209175000 | 1.452627000  |
| 17 | 2.236999000  | 1.165505000  | -0.819971000 |

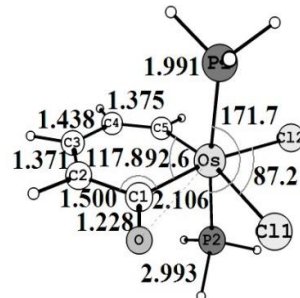

**3Os (C<sub>1</sub>)**

Charge = 0 Multiplicity = 1

Nlmg = 0

E1 = 0.127409



E2 = -1965.4882895

|    |              |              |              |
|----|--------------|--------------|--------------|
| 6  | -3.260594000 | -0.084951000 | -0.513658000 |
| 6  | -2.772498000 | -0.302414000 | 0.749401000  |
| 6  | -1.350276000 | -0.375168000 | 1.219846000  |
| 6  | -1.127916000 | 0.175389000  | -1.682466000 |
| 6  | -2.501539000 | 0.122457000  | -1.717607000 |
| 1  | -4.361118000 | -0.081360000 | -0.610947000 |
| 1  | -3.480264000 | -0.400520000 | 1.588522000  |
| 1  | -0.598585000 | 0.233948000  | -2.661863000 |
| 1  | -3.047877000 | 0.196885000  | -2.673138000 |
| 8  | -1.182293000 | -0.597423000 | 2.415511000  |
| 76 | 0.168356000  | 0.048039000  | -0.176121000 |
| 15 | 0.011255000  | 2.331141000  | 0.417947000  |
| 1  | 0.039848000  | 2.621321000  | 1.817107000  |
| 1  | 1.071282000  | 3.176806000  | -0.036627000 |
| 1  | -1.115512000 | 3.123576000  | 0.026866000  |
| 15 | 0.587084000  | -2.258296000 | -0.548200000 |
| 1  | 1.934855000  | -2.586355000 | -0.891392000 |
| 1  | 0.382926000  | -3.138104000 | 0.558323000  |
| 1  | -0.105894000 | -2.992363000 | -1.565311000 |
| 17 | 1.422015000  | -0.358783000 | 1.924197000  |
| 17 | 2.286543000  | 0.515846000  | -1.210651000 |

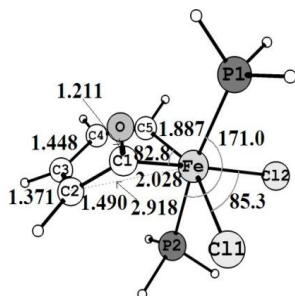

**3Fe-TS(C<sub>1</sub>)**

Charge = 0 Multiplicity = 1

Nlmg = 1

E1 = 0.127536

E2 = -3138.3959114

|    |              |              |              |
|----|--------------|--------------|--------------|
| 6  | -3.058876000 | 0.034398000  | -0.340983000 |
| 6  | -2.416357000 | 0.258541000  | 0.849691000  |
| 6  | -1.093128000 | 0.942125000  | 0.871723000  |
| 6  | -1.009865000 | 0.290211000  | -1.634300000 |
| 6  | -2.381299000 | 0.194830000  | -1.610187000 |
| 1  | -4.121991000 | -0.260284000 | -0.330006000 |
| 1  | -2.895129000 | 0.075991000  | 1.826594000  |
| 1  | -0.519548000 | 0.592736000  | -2.586003000 |
| 1  | -2.986397000 | 0.243668000  | -2.532896000 |
| 8  | -0.867725000 | 1.983546000  | 1.447297000  |
| 26 | 0.258601000  | -0.041367000 | -0.276599000 |
| 15 | 1.294426000  | 1.947536000  | -0.498739000 |
| 1  | 2.251957000  | 2.231502000  | 0.520535000  |
| 1  | 2.113444000  | 2.154425000  | -1.654064000 |
| 1  | 0.568235000  | 3.181264000  | -0.496188000 |

|    |              |              |              |
|----|--------------|--------------|--------------|
| 15 | -0.458738000 | -2.159900000 | 0.024450000  |
| 1  | 0.605366000  | -3.109768000 | 0.081745000  |
| 1  | -1.177978000 | -2.532225000 | 1.199225000  |
| 1  | -1.288065000 | -2.809979000 | -0.954047000 |
| 17 | 0.940787000  | -0.444851000 | 1.952187000  |
| 17 | 2.288043000  | -0.831345000 | -0.844130000 |

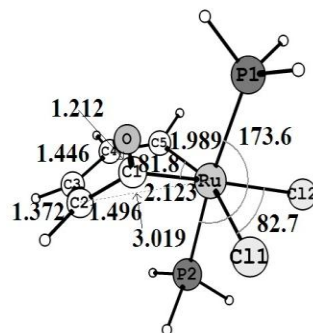

**3Ru-TS(C<sub>1</sub>)**

Charge = 0 Multiplicity = 1

Nlmg = 1

E1 = 0.126890

E2 = -1969.689393

|    |              |              |              |
|----|--------------|--------------|--------------|
| 6  | 3.181790000  | -0.054872000 | -0.293601000 |
| 6  | 2.531688000  | -0.322555000 | 0.884038000  |
| 6  | 1.182218000  | -0.965383000 | 0.933207000  |
| 6  | 1.161578000  | -0.218391000 | -1.655854000 |
| 6  | 2.533407000  | -0.145169000 | -1.583111000 |
| 1  | 4.250888000  | 0.215937000  | -0.255821000 |
| 1  | 3.025391000  | -0.185245000 | 1.861815000  |
| 1  | 0.706270000  | -0.507689000 | -2.629866000 |
| 1  | 3.161605000  | -0.178652000 | -2.490514000 |
| 8  | 0.940397000  | -1.963478000 | 1.577545000  |
| 44 | -0.232266000 | 0.068379000  | -0.265806000 |
| 15 | -1.253056000 | -2.033109000 | -0.603247000 |
| 1  | -2.195564000 | -2.395308000 | 0.405474000  |
| 1  | -2.055935000 | -2.251722000 | -1.768215000 |
| 1  | -0.467382000 | -3.227913000 | -0.633504000 |
| 15 | 0.563747000  | 2.230248000  | 0.194473000  |
| 1  | -0.385440000 | 3.275373000  | -0.037640000 |
| 1  | 0.943816000  | 2.551903000  | 1.532501000  |
| 1  | 1.684717000  | 2.777337000  | -0.513762000 |
| 17 | -1.122382000 | 0.248139000  | 2.016684000  |
| 17 | -2.358577000 | 0.922817000  | -0.838556000 |

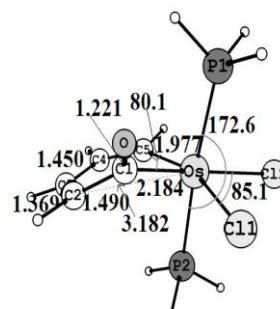

**3Os-TS (C<sub>1</sub>)**

Charge = 0 Multiplicity = 1

Nlmg = 1

E1 = 0.126632

E2 = -1965.4966385

|    |              |              |              |
|----|--------------|--------------|--------------|
| 6  | -3.320714000 | -0.083085000 | -0.380744000 |
| 6  | -2.766870000 | 0.456090000  | 0.748730000  |
| 6  | -1.378041000 | 0.991549000  | 0.826326000  |
| 6  | -1.212052000 | -0.215657000 | -1.562676000 |
| 6  | -2.570102000 | -0.338931000 | -1.595227000 |
| 1  | -4.403820000 | -0.294266000 | -0.388242000 |
| 1  | -3.390783000 | 0.675532000  | 1.631797000  |
| 1  | -0.602258000 | -0.253836000 | -2.503835000 |
| 1  | -3.109908000 | -0.601653000 | -2.520132000 |
| 8  | -1.146549000 | 2.003579000  | 1.468869000  |
| 76 | 0.220241000  | -0.079709000 | -0.207087000 |
| 15 | 1.037328000  | 2.088494000  | -0.783247000 |
| 1  | 1.880223000  | 2.660151000  | 0.216859000  |
| 1  | 1.876729000  | 2.257116000  | -1.930739000 |
| 1  | 0.127872000  | 3.172167000  | -0.985072000 |
| 15 | -0.397191000 | -2.212268000 | 0.602281000  |
| 1  | 0.627900000  | -3.209961000 | 0.557265000  |
| 1  | -0.775584000 | -2.310375000 | 1.975224000  |
| 1  | -1.469596000 | -2.935196000 | -0.013470000 |
| 17 | 1.078476000  | 0.174092000  | 2.054021000  |
| 17 | 2.424933000  | -0.887833000 | -0.733783000 |

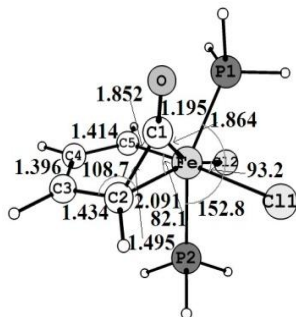

**4Fe (C<sub>1</sub>)**

Charge = 0 Multiplicity = 1

Nlmg = 0

E1 = 0.130301

E2 = -3138.4340041

|   |              |              |              |
|---|--------------|--------------|--------------|
| 6 | -2.840625000 | -0.129962000 | -0.351673000 |
| 6 | -1.892451000 | 0.058289000  | 0.708093000  |
| 6 | -1.034421000 | 1.282464000  | 0.718360000  |

|    |              |              |              |
|----|--------------|--------------|--------------|
| 6  | -0.909260000 | -0.080945000 | -1.689429000 |
| 6  | -2.321966000 | -0.120569000 | -1.647857000 |
| 1  | -3.906644000 | -0.301348000 | -0.121054000 |
| 1  | -2.140193000 | -0.242337000 | 1.743868000  |
| 1  | -0.398025000 | -0.141863000 | -2.672702000 |
| 1  | -2.964580000 | -0.165283000 | -2.544106000 |
| 8  | -1.113740000 | 2.403860000  | 1.124363000  |
| 26 | 0.035476000  | -0.006273000 | -0.098833000 |
| 15 | 1.312471000  | 1.724779000  | -0.734690000 |
| 1  | 2.625378000  | 1.705767000  | -0.188874000 |
| 1  | 1.582412000  | 1.909697000  | -2.124217000 |
| 1  | 0.906608000  | 3.054563000  | -0.378066000 |
| 15 | -0.255694000 | -2.100515000 | 0.615337000  |
| 1  | 0.935570000  | -2.871990000 | 0.715533000  |
| 1  | -0.849984000 | -2.350346000 | 1.888142000  |
| 1  | -1.064471000 | -2.973567000 | -0.194095000 |
| 17 | 1.175851000  | -0.028553000 | 1.999007000  |
| 17 | 1.847804000  | -0.977958000 | -1.245145000 |

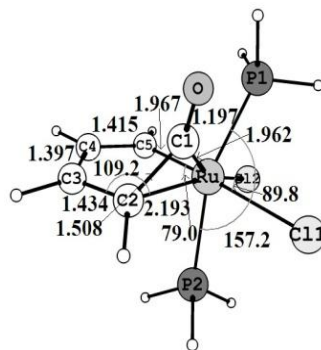

**4Ru (C<sub>1</sub>)**

Charge = 0 Multiplicity = 1

Nlmg = 0

E1 = 0.129235

E2 = -1969.7348802

|    |              |              |              |
|----|--------------|--------------|--------------|
| 6  | 2.943657000  | 0.115875000  | -0.303450000 |
| 6  | 1.982534000  | 0.125592000  | 0.760463000  |
| 6  | 1.114798000  | -1.066239000 | 1.078260000  |
| 6  | 1.065610000  | -0.152433000 | -1.713318000 |
| 6  | 2.475362000  | -0.117485000 | -1.598937000 |
| 1  | 4.002187000  | 0.341037000  | -0.082888000 |
| 1  | 2.221499000  | 0.667641000  | 1.696151000  |
| 1  | 0.611285000  | -0.233296000 | -2.723259000 |
| 1  | 3.159417000  | -0.221146000 | -2.458673000 |
| 8  | 1.206489000  | -2.062658000 | 1.735388000  |
| 44 | -0.035024000 | 0.011031000  | -0.091163000 |
| 15 | -1.141590000 | -2.041562000 | -0.493546000 |
| 1  | -2.459588000 | -2.080305000 | 0.040664000  |
| 1  | -1.367409000 | -2.432885000 | -1.845947000 |
| 1  | -0.605014000 | -3.254671000 | 0.048156000  |
| 15 | 0.174144000  | 2.324255000  | 0.305647000  |

|    |              |             |              |
|----|--------------|-------------|--------------|
| 1  | -1.041258000 | 3.047672000 | 0.151595000  |
| 1  | 0.605885000  | 2.754264000 | 1.593813000  |
| 1  | 1.052134000  | 3.110567000 | -0.517190000 |
| 17 | -1.445287000 | 0.373313000 | 1.946286000  |
| 17 | -1.923541000 | 0.605790000 | -1.492991000 |

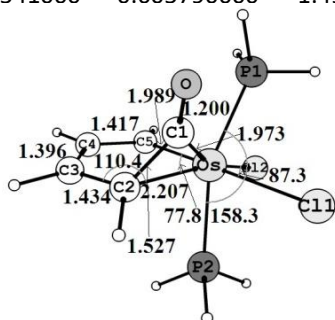

**4OS**

Charge = 0 Multiplicity = 1

Nlmg = 0

E1 = 0.129175

E2 = -1965.5391434

|    |              |              |              |
|----|--------------|--------------|--------------|
| 6  | 2.985084000  | 0.218908000  | -0.272564000 |
| 6  | 1.989913000  | 0.362461000  | 0.749227000  |
| 6  | 1.152436000  | -0.798236000 | 1.281555000  |
| 6  | 1.148717000  | -0.321043000 | -1.657849000 |
| 6  | 2.555388000  | -0.214236000 | -1.528203000 |
| 1  | 4.031280000  | 0.503100000  | -0.062777000 |
| 1  | 2.189026000  | 1.061651000  | 1.585447000  |
| 1  | 0.729488000  | -0.577909000 | -2.653806000 |
| 1  | 3.259489000  | -0.413227000 | -2.353872000 |
| 8  | 1.303197000  | -1.657528000 | 2.105944000  |
| 76 | -0.022855000 | 0.006632000  | -0.083758000 |
| 15 | -0.937285000 | -2.201997000 | -0.251861000 |
| 1  | -2.258138000 | -2.293291000 | 0.270051000  |

|    |              |              |              |
|----|--------------|--------------|--------------|
| 1  | -1.096945000 | -2.770368000 | -1.549682000 |
| 1  | -0.299853000 | -3.279072000 | 0.442815000  |
| 15 | 0.006216000  | 2.381733000  | 0.104730000  |
| 1  | -1.249057000 | 2.993026000  | -0.171983000 |
| 1  | 0.328052000  | 2.932092000  | 1.378600000  |
| 1  | 0.873457000  | 3.163739000  | -0.732108000 |
| 17 | -1.615915000 | 0.500156000  | 1.830437000  |
| 17 | -1.926353000 | 0.279449000  | -1.586947000 |
| 6  | 1.250521000  | -0.129703000 | 1.161879000  |
| 1  | 3.280248000  | -0.316403000 | 1.891748000  |
| 1  | 4.327821000  | -0.238158000 | -0.371861000 |
| 1  | 2.904274000  | 0.039615000  | -2.432395000 |
| 1  | 0.850463000  | -0.167345000 | 2.196484000  |
| 17 | -1.742252000 | 0.022582000  | -1.802938000 |
| 17 | -1.806957000 | 0.079043000  | 1.756863000  |
| 1  | -0.007646000 | 3.018673000  | -1.078017000 |
| 1  | -1.882433000 | 2.653444000  | -0.000663000 |
| 1  | -0.025910000 | 3.006099000  | 1.101568000  |
| 1  | -0.051320000 | -3.021688000 | -0.884170000 |
| 1  | -2.011426000 | -2.512199000 | -0.051818000 |
| 1  | -0.302541000 | -2.882416000 | 1.276503000  |
| 26 | -0.236458000 | 0.026748000  | 0.006404000  |
| 15 | -0.522500000 | 2.234438000  | 0.002522000  |
| 15 | -0.641645000 | -2.155164000 | 0.09213700   |

**Table S5:** Natural atomic orbital occupancies on the selected atoms (C1, O, M = Fe, Ru, Os) in **2M** and **3M** (M = Fe, Ru, Os) at the M06/def2-TZVPP//BP86 /def2-SVP level of theory.

|            |    | Valance Occupancy |                |                |                |                 |                 |                 |                                          |                            |
|------------|----|-------------------|----------------|----------------|----------------|-----------------|-----------------|-----------------|------------------------------------------|----------------------------|
|            |    | s                 | p <sub>x</sub> | p <sub>y</sub> | p <sub>z</sub> | d <sub>xy</sub> | d <sub>xz</sub> | d <sub>yz</sub> | d <sub>x<sup>2</sup>-y<sup>2</sup></sub> | d <sub>z<sup>2</sup></sub> |
| <b>2Fe</b> | C1 | 0.86              | 0.92           | 0.80           | 0.73           |                 |                 |                 |                                          |                            |
|            | Fe | 0.38              | 0.36           | 0.30           | 0.38           | 1.30            | 1.82            | 1.80            | 1.28                                     | 1.34                       |
|            | O  | 1.66              | 1.52           | 1.52           | 1.62           |                 |                 |                 |                                          |                            |
| <b>2Ru</b> | C1 | 0.86              | 0.94           | 0.80           | 0.74           |                 |                 |                 |                                          |                            |
|            | Ru | 0.40              | 0.35           | 0.29           | 0.40           | 1.31            | 1.79            | 1.84            | 1.29                                     | 1.38                       |
|            | O  | 1.67              | 1.52           | 1.51           | 1.64           |                 |                 |                 |                                          |                            |
| <b>2Os</b> | C1 | 0.89              | 0.98           | 0.85           | 0.76           |                 |                 |                 |                                          |                            |
|            | Os | 0.46              | 0.23           | 0.19           | 0.21           | 1.20            | 1.75            | 1.87            | 1.13                                     | 1.28                       |
|            | O  | 1.68              | 1.53           | 1.53           | 1.66           |                 |                 |                 |                                          |                            |
| <b>3Fe</b> | C1 | 0.93              | 0.93           | 0.79           | 0.74           |                 |                 |                 |                                          |                            |
|            | Fe | 0.42              | 0.32           | 0.34           | 0.36           | 1.54            | 1.77            | 1.37            | 1.18                                     | 1.59                       |
|            | O  | 1.71              | 1.60           | 1.56           | 1.53           |                 |                 |                 |                                          |                            |
| <b>3Ru</b> | C1 | 0.93              | 0.93           | 0.76           | 0.77           |                 |                 |                 |                                          |                            |
|            | Ru | 0.43              | 0.30           | 0.34           | 0.33           | 1.59            | 1.57            | 1.36            | 1.30                                     | 1.75                       |
|            | O  | 1.71              | 1.63           | 1.54           | 1.54           |                 |                 |                 |                                          |                            |
| <b>3Os</b> | C1 | 0.96              | 0.99           | 0.85           | 0.73           |                 |                 |                 |                                          |                            |
|            | Os | 0.51              | 0.21           | 0.21           | 0.20           | 1.31            | 1.77            | 1.73            | 1.21                                     | 1.19                       |
|            | O  | 1.70              | 1.71           | 1.58           | 1.47           |                 |                 |                 |                                          |                            |
